# Supplementary material
Source: Elsevier journal article supplement (https://www.sciencedirect.com/science/article/pii/S0213911120302041)
Supplement: mmc1 [file S0213911120302041:mmc1.docx]

**Apéndice**

**Tabla I**

Operacionalización de la limitación auditiva y la fragilidad

| **Variable** | **Pregunta / respuesta** | **Respuesta** | **Puntos de corte** |
| --- | --- | --- | --- |
| Limitación auditiva17,18 | ¿Siente que tiene algún problema para oír? No / Sí (No continuar si la respuesta es afirmativa) | Sí = 1 punto | Limitación ≥1 punto |
| ¿Tiene dificultad para oír la televisión o la radio porque no oye bien? No / Sí | Sí = 1 punto |
| ¿Tiene dificultad para oír cuando alguien le habla en voz baja? No / Sí | Sí = 1 punto |
| En caso de que utilice audífono, comenzar la pregunta «Utilizando el audífono…» |  |  |
| Fragilidad social16 | ¿Con quién vive habitualmente? Respuesta abierta | Solo = 1 punto | Prefragilidad = 1 punto  Fragilidad ≥2 puntos |
| ¿Tiene familiares o amigos a los que pudiera pedir ayuda si la necesitara? No / Sí | No = 1 punto |
| ¿Con qué frecuencia se reúne o habla con sus familiares más cercanos? | Menos de una vez por semana = 1 punto |
| ¿Con qué frecuencia se reúne o habla con sus amigos o vecinos? | Más de una vez por semana = 1 punto |
| ¿Hay alguien especial (pareja, amigo, familiar o vecino) en quien pueda confiar y hablar sobre asuntos personales y sus sentimientos? No / Sí | No = 1 punto |
| En los últimos 3 meses, ¿ha conseguido ayuda de otras personas cuando la ha necesitado para comprar, preparar alimentos, limpiar la casa, planchar u otras actividades personales? No / Sí | No = 1 punto |
| Fragilidad física24,25 | ¿Qué parte del tiempo durante las últimas 4 semanas se sintió cansado? Todo el tiempo / La mayor parte del tiempo / Alguna parte del tiempo / Un poco del tiempo / En ningún momento | Todo el tiempo o la mayor parte del tiempo = 1 punto | Prefragilidad = 1-2 puntos  Fragilidad ≥3 puntos |
| ¿Tiene alguna dificultad para subir 10 escalones sin descansar por usted mismo, sin ningún tipo de ayuda? No / Sí | Sí = 1 punto |
| Por usted mismo y sin el uso de ayudas, ¿tiene alguna dificultad para caminar varios cientos de metros? No / Sí | Sí = 1 punto |
| ¿Alguna vez un médico le ha dicho que usted tiene…?: Hipertensión, diabetes, cáncer, enfermedad pulmonar crónica, infarto, insuficiencia cardiaca, angina de pecho, asma, artritis, ictus o enfermedad renal | Cinco enfermedades = 1 punto |
| ¿Ha perdido más del 5% de su peso corporal durante el último año? No / Sí | Sí = 1 punto |  |

**Tabla II**

Asociación entre limitación auditiva (sin considerar aquellas personas que responden de forma negativa a la pregunta directa) y estadios de fragilidad social, global y según sexo

|  | | **Robustez social** | **Prefragilidad social** | **Fragilidad social** |
| --- | --- | --- | --- | --- |
| *Toda la muestra* | |  |  |  |
|  | Participantes, n (%) | 178 (40,0) | 164 (36,9) | 103 (23,1) |
|  | OR (IC95%) cruda | 1,00 | 1,12 (0,72-1,72) | 1,62 (1,00-2,66) |
|  | OR (IC95%) ajustada por sexo y edad | 1,00 | 1,00 (0,63-1,58) | 1,50 (0,90-2,50) |
|  | OR (IC95%) totalmente ajustadaa | 1,00 | 0,96 (0,60-1,54) | 1,48 (0,86-2,50) |
| *Hombres* | |  |  |  |
|  | Participantes, n (%) | 98 (55,1) | 54 (32,9) | 38 (36,9) |
|  | OR (IC95%) cruda | 1,00 | 0,70 (0,35-1,39) | 0,91 (0,42-1.95) |
|  | OR (IC95%) ajustada por edad | 1,00 | 0,68 (0,33-1,38) | 0,94 (0,43-2,08) |
|  | OR (IC95%) totalmente ajustadaa | 1,00 | 0,67 (0,32-1,40) | 1,08 (0,47-2,47) |
| *Mujeres* | |  |  |  |
|  | Participantes, n (%) | 80 (44,9) | 110 (67,1) | 65 (63,1) |
|  | OR (IC95%) cruda | 1,00 | 1,61 (0,88-2,93) | 2,58 (1,31-5,07) |
|  | OR (IC95%) ajustada por edad | 1,00 | 1,39 (0,74-2,61) | 2,18 (1,07-4,41) |
|  | OR (IC95%) totalmente ajustadaa | 1,00 | 1,25 (0,65-2,40) | 2,20 (1,04-4,63) |

IC95%: intervalo de confianza del 95%; OR: *odds ratio.*

aOR ajustada por sexo, edad (65-69, 70-74, 75-79, 80-84, ≥85 años), nivel de estudios (primarios o menos, secundarios, universitarios), ocio activo (sí, no), índice de masa corporal (normopeso, sobrepeso, obesidad), estado cognitivo (normal, deterioro leve/moderado), estado de salud (muy malo/malo, regular, bueno/muy bueno) y fragilidad física (robusto, prefrágil, frágil).
